# Supplementary material for: Bee venom acupuncture for rheumatoid arthritis: a systematic review of randomised clinical trials
Source: HighWire-hosted journal article supplement (doi:10.1136/bmjopen-2014-006140), 2014-11-01
Supplement: bmjopen-2014-006140supp3.pdf [file bmjopen-2014-006140supp3.pdf]

### Supplement 3. Summary of treatment bee sting therapy on acupoints for rheumatoid arthritis

| First author (Year) | Type of acupuncture                                                                                   | Total treatment (sessions) | Main acupoints                                   | Dialectical acupoints                                                                                                                                                                | Treatment Rationale            | Adverse events                                                                                            |
|---------------------|-------------------------------------------------------------------------------------------------------|----------------------------|--------------------------------------------------|--------------------------------------------------------------------------------------------------------------------------------------------------------------------------------------|--------------------------------|-----------------------------------------------------------------------------------------------------------|
| Liu (2008)          | Bee sting therapy (Live bee, 8-15bees)                                                                | 3 months                   | Ashi points                                      | Cold dampness invasion, joint pain: CV6, RN4; Hot and humid embodiment, joint swelling pain: LI11, GV14; Phlegm and blood stasis in the resistance, Joint deformities pain:ST40,GB39 | CM theory, Clinical experience | Dizziness (B:4), fever(A:1), hypersensitivity(A:4), leukopenia(B:3), loss of appetite and nausea(B:6)     |
| Zhang (2011)        | Bee sting therapy (Live bee, 5-15bees)                                                                | 3 months                   | Ashis points near knee                           | n.r.                                                                                                                                                                                 | CM theory, Clinical experience | Dizziness(A:1), epigastric discomfort(A:4), fever(A:2), hypersensitivity(A:1), leukopenia(B:3), rash(A:3) |
| Deng (2011)         | Bee sting therapy (Live bee, before 15-25days: 2-3bees; after 15-25days: 1-3bees increase every time) | 2 months                   | Ashi points                                      | Ankle:BL62, KI6, BL60, GB40; back: GV26, V12, GV3; elbow: LI11, L4, SJ10, SJ5, LU5; knee:ST35, ST34, GB34, GB33; Shoulders:LI16, SJ14, SI10; wrist:SJ4, SJ5 LI5, SI4                 | CM theory, Clinical experience | Epigastric discomfort (C:6),hypersensitivity (A:3), insomnia(C:3), leukopenia(B:1), nausea(A:2,B:3)       |
| Zhou (2012)         | Bee sting therapy (Live bee, 5-10bees)                                                                | 3 months                   | Ashi points, acupoints in near in the pain point | n.r.                                                                                                                                                                                 | CM theory, Clinical experience | n.r.                                                                                                      |

CM: Chinese medicine; n.r.: not reported

#### References

- Deng M, Zhang WN. Clinical observation on 20 cases of bee needle therapy in the treatment of rheumatoid arthritis. *Guiding J Tradit Chin Med Pharm* 2011;17(6):71-73.
- Liu XD, Zhang JL, Zheng HG, Li Z, D., Cai L, Liu FY, et al. Effect of bee-sting therapy on TNF- $\alpha$  and IL-1 $\beta$  in peripheral blood of rheumatoid arthritis patients. *Chin Arch Tradit Chin Med* 2008;26(5):996-97.
- Zhang JL, Liu XD, Ye LH, Zhang P. Clinical randomized comparison study of bee-sting therapy for knee synovitis caused by rheumatoid arthritis. *Chin Arch Tradit Chin Med* 2011;29(8):1904-06.
- Zhou YF, Li WY. Effect of needle on hypothalamic-pituitary-adrenal axis of patient with rheumatoid arthritis. *Nei Mongol J Tradit Chin Med* 2012;26(5):1-3.
